# Supplementary material for: Low melting molecular complexes. The structures of molecular complexes of tri- and di-chloromethanes with small ketones and 1,4-dioxane
Source: Royal Society of Chemistry journal article supplement (doi:10.1039/c2ce06526f), 2012-01-01
Supplement: c2ce06526f.pdf [file c2ce06526f.pdf]

Electronic Supplementary information for the paper

**Low melting molecular complexes. Part 2. The structures of molecular complexes of tri- and di-chloromethanes with small ketones and 1,4-dioxane<sup>i</sup>**

by D.S.Yufit\* and J.A.K.Howard

Table S1 Bond Lengths for **1**.

| Atom | Atom | Length/Å   | Atom | Atom | Length/Å |
|------|------|------------|------|------|----------|
| C11  | C1S  | 1.7604(16) | C1   | C4   | 1.511(2) |
| C12  | C1S  | 1.7615(15) | C1   | C2   | 1.511(2) |
| C13  | C1S  | 1.7531(16) | C3   | C4   | 1.528(3) |
| C1   | O1   | 1.196(2)   | C3   | C2   | 1.538(3) |

Table S2 Bond Angles for **1**.

| Atom | Atom | Atom | Angle/°    | Atom | Atom | Atom | Angle/°   |
|------|------|------|------------|------|------|------|-----------|
| O1   | C1   | C4   | 133.77(16) | C11  | C1S  | C12  | 110.40(8) |
| O1   | C1   | C2   | 133.83(15) | C4   | C3   | C2   | 90.62(14) |
| C4   | C1   | C2   | 92.34(14)  | C1   | C4   | C3   | 88.43(14) |
| C13  | C1S  | C11  | 111.25(9)  | C1   | C2   | C3   | 88.03(13) |
| C13  | C1S  | C12  | 110.29(9)  |      |      |      |           |

Table S3 Bond Lengths for **2**.

| Atom | Atom | Length/Å   | Atom | Atom | Length/Å   |
|------|------|------------|------|------|------------|
| C11  | C1S  | 1.752(3)   | C1   | C4   | 1.5156(18) |
| C12  | C1S  | 1.756(2)   | C2   | C3   | 1.5471(19) |
| O1   | C1   | 1.2036(16) | C3   | C4   | 1.535(2)   |
| C1   | C2   | 1.505(2)   |      |      |            |

Table S4 Bond Angles for **2**.

| Atom | Atom | Atom | Angle/°    | Atom | Atom | Atom | Angle/°   |
|------|------|------|------------|------|------|------|-----------|
| C11  | C1S  | C12  | 111.66(13) | C1   | C4   | C3   | 87.92(11) |
| O1   | C1   | C2   | 133.66(12) | C2   | C1   | C4   | 92.70(11) |
| O1   | C1   | C4   | 133.49(14) | C4   | C3   | C2   | 90.32(11) |
| C1   | C2   | C3   | 87.86(11)  |      |      |      |           |

Table S5 Bond Lengths for **3**.

| Atom | Atom | Length/Å   | Atom | Atom | Length/Å   |
|------|------|------------|------|------|------------|
| O1   | C1   | 1.2160(17) | C4   | C5   | 1.519(2)   |
| C1   | C6   | 1.497(2)   | C5   | C6   | 1.529(2)   |
| C1   | C2   | 1.497(2)   | C11  | C1S  | 1.759(2)   |
| C2   | C3   | 1.527(2)   | C12  | C1S  | 1.7624(18) |
| C3   | C4   | 1.506(3)   |      |      |            |

Table S6 Bond Angles for **3**.

| Atom | Atom | Atom | Angle/°    | Atom | Atom | Atom | Angle/°    |
|------|------|------|------------|------|------|------|------------|
| O1   | C1   | C6   | 122.67(15) | C3   | C4   | C5   | 111.37(14) |
| O1   | C1   | C2   | 121.93(17) | C4   | C5   | C6   | 111.39(13) |
| C6   | C1   | C2   | 115.39(14) | C1   | C6   | C5   | 111.69(14) |
| C1   | C2   | C3   | 112.05(14) | C11  | C1S  | C12  | 111.08(10) |
| C4   | C3   | C2   | 111.75(17) |      |      |      |            |

Table S7 Bond Lengths for **4**.

| Atom | Atom | Length/Å | Atom | Atom | Length/Å  |
|------|------|----------|------|------|-----------|
| C11  | C1S  | 1.764(7) | C1   | C2   | 1.57(2)   |
| C12  | C1S  | 1.739(6) | C1   | C3   | 1.510(18) |
| C13  | C1S  | 1.752(7) | C3   | C4   | 1.616(19) |
| C14  | C2S  | 1.752(7) | O1A  | C1A  | 1.233(14) |
| C15  | C2S  | 1.749(7) | C1A  | C2A  | 1.44(2)   |

|     |     |           |     |     |           |
|-----|-----|-----------|-----|-----|-----------|
| Cl6 | C2S | 1.776(7)  | C1A | C3A | 1.430(19) |
| O1  | C1  | 1.194(14) | C3A | C4A | 1.42(3)   |

Table S8 Bond Angles for 4.

| Atom | Atom | Atom | Angle/°   | Atom | Atom | Atom | Angle/°   |
|------|------|------|-----------|------|------|------|-----------|
| Cl2  | C1S  | C11  | 110.6(3)  | O1   | C1   | C3   | 123.2(12) |
| Cl2  | C1S  | C13  | 112.1(4)  | C1   | C3   | C4   | 112.0(10) |
| Cl3  | C1S  | C11  | 110.4(3)  | C3   | C1   | C2   | 116.9(11) |
| Cl4  | C2S  | Cl6  | 109.7(4)  | O1A  | C1A  | C2A  | 124.5(13) |
| Cl5  | C2S  | Cl4  | 111.1(4)  | O1A  | C1A  | C3A  | 123.1(13) |
| Cl5  | C2S  | Cl6  | 109.8(4)  | C1A  | C3A  | C4A  | 115.5(15) |
| O1   | C1   | C2   | 119.4(13) | C3A  | C1A  | C2A  | 112.5(13) |

Table S9 Bond Lengths for 5.

| Atom | Atom | Length/Å   | Atom | Atom | Length/Å |
|------|------|------------|------|------|----------|
| Cl1  | C1S  | 1.7595(17) | C1   | C2   | 1.494(3) |
| Cl2  | C1S  | 1.7629(18) | C2   | C3   | 1.485(2) |
| O1   | C2   | 1.2127(18) | C3   | C4   | 1.502(3) |

Table S10 Bond Angles for 5.

| Atom | Atom | Atom | Angle/°    | Atom | Atom | Atom | Angle/°    |
|------|------|------|------------|------|------|------|------------|
| Cl1  | C1S  | Cl2  | 110.71(10) | C2   | C3   | C4   | 114.91(16) |
| O1   | C2   | C1   | 122.01(16) | C3   | C2   | C1   | 116.44(16) |
| O1   | C2   | C3   | 121.54(17) |      |      |      |            |

Table S11 Bond Lengths for 6.

| Atom | Atom | Length/Å   | Atom | Atom | Length/Å   |
|------|------|------------|------|------|------------|
| Cl1  | C1S  | 1.7629(11) | O1   | C1   | 1.2148(15) |
| Cl2  | C1S  | 1.7619(12) | C1   | C2   | 1.491(2)   |
| Cl3  | C1S  | 1.7591(12) | C1   | C3   | 1.501(2)   |

Table S12 Bond Angles for 6.

| Atom | Atom | Atom | Angle/°   | Atom | Atom | Atom | Angle/°    |
|------|------|------|-----------|------|------|------|------------|
| C12  | C1S  | C11  | 110.18(6) | O1   | C1   | C2   | 121.92(14) |
| C13  | C1S  | C11  | 110.52(7) | O1   | C1   | C3   | 120.80(15) |
| C13  | C1S  | C12  | 110.17(6) | C2   | C1   | C3   | 117.28(13) |

Table S13 Bond Lengths for **7**.

| Atom | Atom | Length/Å | Atom | Atom | Length/Å |
|------|------|----------|------|------|----------|
| C11  | C1S  | 1.765(2) | C1   | C2   | 1.489(3) |
| C12  | C1S  | 1.758(2) | C1   | C3   | 1.488(2) |
| O1   | C1   | 1.207(2) |      |      |          |

Table S14 Bond Angles for **7**.

| Atom | Atom | Atom | Angle/°    | Atom | Atom | Atom | Angle/°    |
|------|------|------|------------|------|------|------|------------|
| C12  | C1S  | C11  | 111.22(10) | O1   | C1   | C3   | 121.89(17) |
| O1   | C1   | C2   | 120.85(17) | C3   | C1   | C2   | 117.26(19) |

Table S15 Bond Lengths for **8**.

| Atom | Atom | Length/Å | Atom | Atom | Length/Å |
|------|------|----------|------|------|----------|
| C11  | C1S  | 1.751(2) | O1   | C2   | 1.429(2) |
| C12  | C1S  | 1.757(2) | C1   | C2   | 1.498(3) |
| C13  | C1S  | 1.758(2) | C2   | C1   | 1.498(3) |
| O1   | C1   | 1.429(3) |      |      |          |

<sup>1</sup>-X,1-Y,1-Z

Table S16 Bond Angles for **8**.

| Atom | Atom | Atom | Angle/°    | Atom | Atom | Atom | Angle/°    |
|------|------|------|------------|------|------|------|------------|
| C1   | O1   | C2   | 109.31(15) | C12  | C1S  | C13  | 110.32(13) |
| C11  | C1S  | C12  | 111.19(10) | O1   | C1   | C2   | 110.81(16) |
| C11  | C1S  | C13  | 110.66(11) | O1   | C2   | C1   | 110.65(18) |

<sup>1</sup>-X,1-Y,1-Z

Table S17 Bond Lengths for **9**.

| Atom | Atom            | Length/Å | Atom | Atom | Length/Å |
|------|-----------------|----------|------|------|----------|
| O1   | C2              | 1.424(2) | C2   | C1   | 1.492(3) |
| O1   | C1              | 1.426(2) | C11  | C1S  | 1.763(2) |
| C1   | C2 <sup>1</sup> | 1.492(3) | C12  | C1S  | 1.750(2) |

<sup>1</sup>-X,1-Y,-Z

Table S18 Bond Angles for **9**.

| Atom | Atom | Atom            | Angle/°    | Atom | Atom | Atom | Angle/°    |
|------|------|-----------------|------------|------|------|------|------------|
| C2   | O1   | C1              | 109.75(14) | O1   | C2   | C1   | 110.40(16) |
| O1   | C1   | C2 <sup>1</sup> | 110.73(15) | C12  | C1S  | C11  | 111.32(11) |

<sup>1</sup>-X,1-Y,-Z

---

<sup>i</sup> Part 1 see D.S.Yufit and J.A.K.Howard, CrystEngComm, 2010, **12**, 737-741
